# Supplementary material for: The Prognostic Impact of Dose-attenuated R-CHOP Therapy for Elderly Patients with Diffuse Large B-cell Lymphoma
Source: PubMed Central journal article supplement — Intern Med. 2018 Aug 10;57(24):3521–8. doi: 10.2169/internalmedicine.0990-18 (PMC6355403; doi:10.2169/internalmedicine.0990-18), 2018-08-10
Supplement: 1349-7235-57-3521-s001.pdf [file 1349-7235-57-3521-s001.pdf]

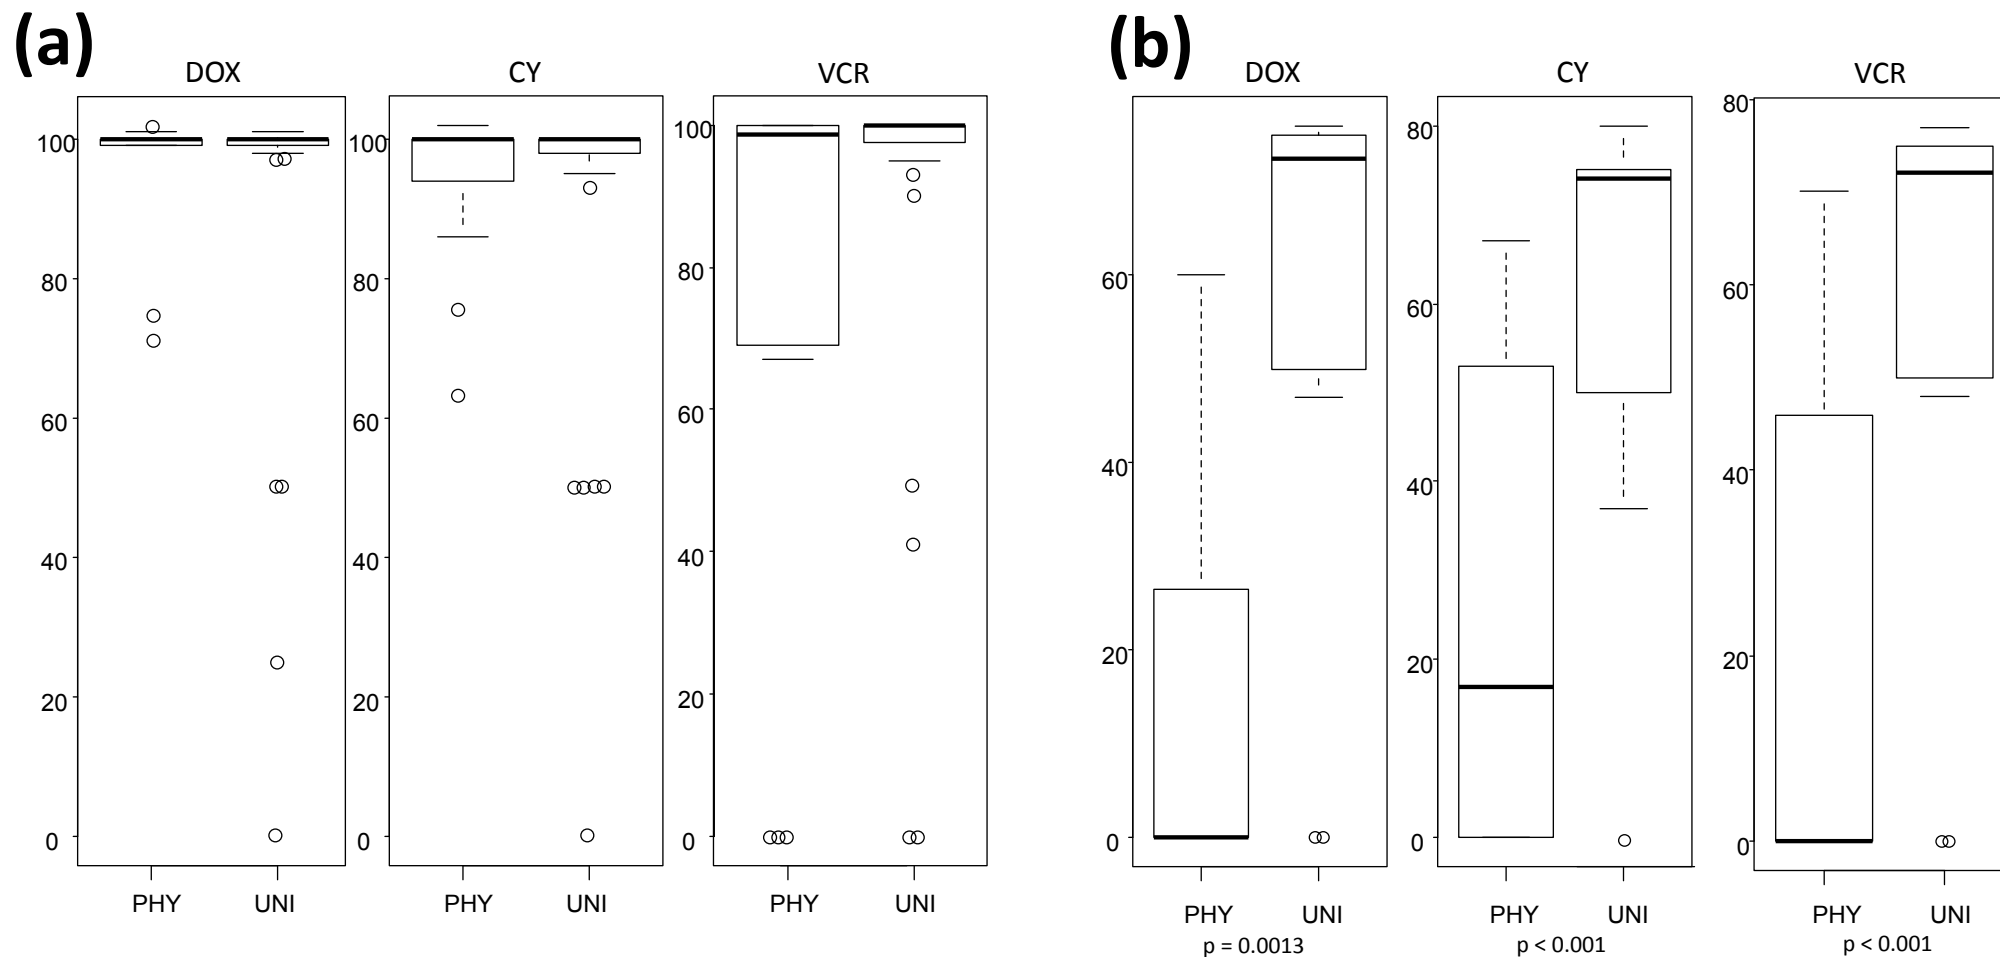

**Supplementary Figure. Comparison of the actually administered doses of the first cycle. Comparison of CY, DOX, and VCR between PHY and UNI group in the patients younger than 70-year old (a) and older than or equal to 70-year old (b). DOX: doxorubicin, CY: cyclophosphamide, PHY: physicians' decision group, UNI: unified dose attenuation group, VCR: vincristine**
