# Supplementary material for: The Prognostic Impact of Dose-attenuated R-CHOP Therapy for Elderly Patients with Diffuse Large B-cell Lymphoma
Source: PubMed Central journal article supplement — Intern Med. 2018 Aug 10;57(24):3521–8. doi: 10.2169/internalmedicine.0990-18 (PMC6355403; doi:10.2169/internalmedicine.0990-18), 2018-08-10
Supplement: 1349-7235-57-3521-s002.pdf [file 1349-7235-57-3521-s002.pdf]

**Supplementary Table 1. All events during or after treatment of both treatment group**

|                                      | <b>PHY (33)</b>  | <b>UNI (82)</b>  |
|--------------------------------------|------------------|------------------|
| Disease progression during treatment | 5 (15.2%)        | 8 (9.8%)         |
| Progression from PR/SD               | 7 (21.2%)        | 7 (8.5%)         |
| Relapse from CR                      | 4 (12.1%)        | 17 (20.7%)       |
| Discontinuation of therapy           | 8 (24.2%)        | 4 (4.9%)         |
| Death during treatment               | 1 (3.0%)         | 4 (4.9%)         |
| Death during CR                      | 0 (0%)           | 2 (2.4%)         |
| No event                             | 8 (24.2%)        | 40 (48.8%)       |
| <b>Total</b>                         | <b>33 (100%)</b> | <b>82 (100%)</b> |

CR: complete remission, PHY: physicians' decision group, RP: partial remission, SD: stable disease, UNI: unified dose attenuation group
