# Supplementary material for: The Prognostic Impact of Dose-attenuated R-CHOP Therapy for Elderly Patients with Diffuse Large B-cell Lymphoma
Source: PubMed Central journal article supplement — Intern Med. 2018 Aug 10;57(24):3521–8. doi: 10.2169/internalmedicine.0990-18 (PMC6355403; doi:10.2169/internalmedicine.0990-18), 2018-08-10
Supplement: 1349-7235-57-3521-s003.pdf [file 1349-7235-57-3521-s003.pdf]

### Supplementary Table 2. Causes of death

|                               | All patients (115) | PHY (33)            | UNI (82)            |
|-------------------------------|--------------------|---------------------|---------------------|
| All death                     | 34 (30%)           | 15 (45%)            | 19 (23%)            |
| Lymphoma-related death        | 20 (17%)           | 8 (24%)             | 12 (15%)            |
| Death not related to lymphoma | 14 (12%)           | 7 (21%)             | 7 (9%)              |
| death from SPM                | 4 (3%)             | 1 (3%) <sup>a</sup> | 3 (4%) <sup>b</sup> |

PHY: physicians' decision group, SPM: secondary primary malignancy, UNI: unified dose attenuation group

<sup>a</sup> one case of colon cancer, <sup>b</sup> one case of lung cancer, two cases of myelodysplastic syndrome
